# Supplementary material for: Pleiotropy method reveals genetic overlap between orofacial clefts at multiple novel loci from GWAS of multi-ethnic trios
Source: PLOS journal article supplement (doi:10.1371/journal.pgen.1009584), 2021-07-09
Supplement: S6 (10.1371/journal.pgen.1009584.s006) [file journal.pgen.1009584.s006]

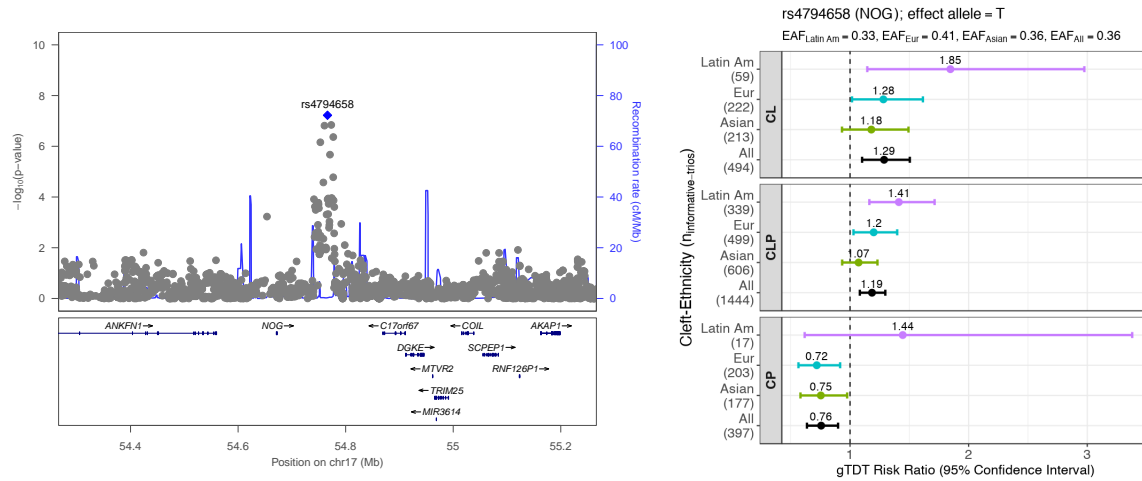

(A) CL/P & CP (All ethnicities)

(B) RR estimates and 95% CIs

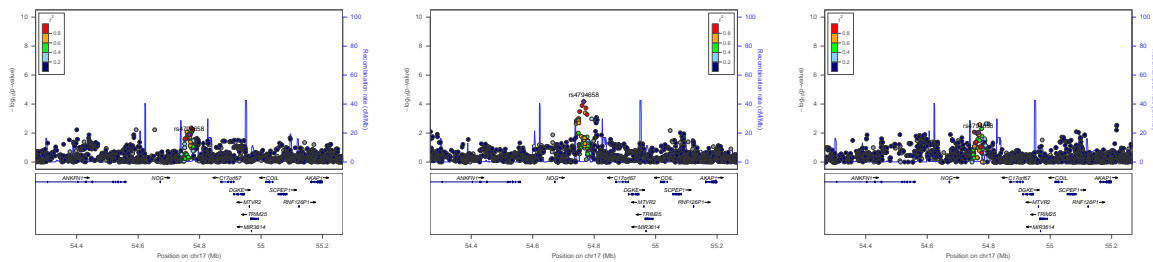

(C) CL/P & CP (Asian)

(D) CL/P & CP (European)

(E) CL/P & CP (Latinx)

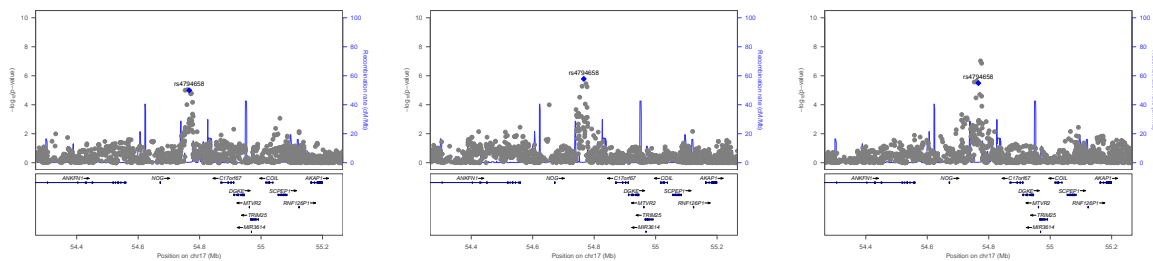

(F) CL & CP (All ethnicities)

(G) CLP & CP (All ethnicities)

(H) CL & CLP (All ethnicities)

**S5 Fig: Regional association plots for 17q22 (NOG) identified as a region of genetic overlap between CL/P & CP.** LocusZoom plots focus on PLACO analysis of (A) CL/P & CP, (C) CL/P & CP in Asian ancestry, (D) CL/P & CP in European ancestry, (E) CL/P & CP in Latin American ancestry, (F) CL & CP, (G) CLP & CP, (H) CL & CLP. The blue or purple diamond represents the most strongly associated SNP in the region showing evidence of genetic overlap. For stratified analyses across racial/ethnic groups, the colors of the SNPs represent their LD with the most strongly associated SNP, as shown in the color legend. For combined multi-ethnic analyses, there is no unique LD between SNPs and hence no color has been used. Panel (B) shows relative risk estimates and their 95% confidence intervals as obtained from the gTDT analyses.
